# Supplementary material
Source: PubMed Central journal article supplement (PMC3746863)
Supplement: 1310067110_pnas.201310067SI.pdf [file 1310067110_pnas.201310067SI.pdf]

# Supporting Information

Girard et al. 10.1073/pnas.1310067110

## SI Materials and Methods

**Plasmids.** The RAR $\alpha$ -PLZF and PLZF-RAR $\alpha$  fusion genes were cloned into the EcoRI site of two retroviral vectors that are based on Moloney murine leukemia virus, pBabe, as well as Moloney murine sarcoma virus, MSCV. These vectors contain a selectable marker, the green fluorescent protein (GFP) or the puromycin-N-acetyltransferase (puro or pac). The HA-hC/EBP $\alpha$  and hJUN-HA were kindly provided by D. G. Tenen (Harvard Medical School, Boston, MA) and by D. Bohmann (University of Rochester Medical Center, Rochester, NY), respectively. RAR $\alpha$ -PLZF and PLZF-RAR $\alpha$  were tagged at their N-terminal region in frame with a HA tag by PCR cloning, respectively, in pcDNA3.1 using the EcoRI and BamHI sites and then transferred in the HpaI and BglII sites of MSCV-neo. RAR $\alpha$ -PLZF and hJUN were also tagged at their C-terminal region with the TAP tag, a gift from B. Coulombe (Clinical Research Institute of Montreal), within the retroviral vector MSCV-neo. A GFP-tagged protein RAR $\alpha$ -PLZF was also obtained by subcloning the EcoRI/BamHI fragment containing the cDNA in the pEGFP-C2 expression vector (Clontech). These constructs were verified by sequencing. Both the HA and GFP tags did not alter the transcriptional properties of RAR $\alpha$ -PLZF in transient transfection assays. The GST-C/EBP $\alpha$  and GST-HDAC1 in pGEX-ZT (Pharmacia), an expression vector for GST fusion proteins, were given by D. G. Tenen and C. Seiser (Medical University of Vienna, Austria), respectively. The wild-type and C/EBP binding site mutant hCSF3R proximal promoter (−1324 + 67) as well as a tetramer of this C/EBP binding site were kindly provided by D. G. Tenen and subcloned in the pXPII luciferase-reporter vector.

**Chromatin Immunoprecipitation.** The following oligonucleotides were used to amplify the mouse *Csf3r* promoter (ACCTGAAG-TAAACGTTACCTG and TCCCGAACTTCTCTTTCTAG) and the *Kit* promoter (GCGGGCAGTCGACCTTAT and TC-GACGTGTTAATGCCGGG).

**Antibodies.** Antibodies against C/EBP $\alpha$  (Santa Cruz Biotechnology, sc-61), HA (Covance, MMS-101R), HDAC1 (Santa Cruz Biotechnology, sc-8410 used in Western blot and IP), HDAC1 (gift from Alain Verrault, used for ChIP), c-Jun (Santa Cruz Biotechnology, sc-44), TAP (Open Bioscience CAB1001) as well as acetyl histone H3 (Upstate Biotechnologies, 06–599), RAR $\alpha$  (Sigma-Aldrich, SAB1100358), G-CSFR (Santa Cruz Biotechnology, sc-9173),  $\beta$ -actin (Sigma-Aldrich, A5441), rabbit pre-immune serum (Sigma-Aldrich), or rabbit IgG (Sigma-Aldrich, I-8140), goat anti-mouse and rabbit anti-goat peroxidase conjugated polyclonal antibodies (Calbiochem-Novabiochem International, 401215 and 401515, respectively), goat anti-rabbit conjugated HRP polyclonal antibody (Biorad, 172–1034), and goat anti-mouse conjugated HRP polyclonal antibody (Biorad, 170–6516)

were used for immunoprecipitation, Western blotting, or chromatin immunoprecipitation.

**Antibodies Used for Flow Cytometry Analysis.** The Gr-1 and CD11b antibodies used were obtained from the hybridomas RB6-8C5 and M1/70.15.11.5HL (ATCC), respectively. Fluorescein isothiocyanate (FITC)-conjugated Annexin V (Biosdesign) and fluoresceinated goat anti-mouse (Caltech), fluorescein-conjugated anti-CD11b and biotinylated Gr-1 antibodies (eBiosciences, 11–0112 and 25–5931, respectively) were also used.

**Electrophoretic Mobility Shift Assays.** DNA binding assays were performed using nuclear extracts (10  $\mu$ g) from 32D cells with the C/EBP site of the *CSF3R* (−57 to −37) promoter (1): wild type, AAG GTG TTG CAA TCC CCA GCC, and mutant AAG GTG TTC ACC AAC CCA GCC. The binding reaction was allowed to proceed for 30 min on ice in 50 mM Tris pH 7.8, 10 mM DTT, 250 mM KCl, 5% glycerol, 5 mg/mL of BSA and 300 ng of poly (dIdC) per reaction. Where indicated, proteins were pre-incubated for 30 min on ice with 2  $\mu$ g of rabbit polyclonal antibodies against C/EBP $\alpha$  (Santa Cruz Biotechnology) or with unlabeled double-stranded oligonucleotide competitors at a molar excess of 100-fold. Protein–DNA complexes were resolved by electrophoresis on acrylamide gels. Gels were dried and exposed to a PhosphoImager screen (Molecular Dynamics).

**GST–Pull-Down Assay.** In vitro translated proteins were synthesized with the TNT-coupled reticulocyte lysate system (Promega) and labeled with [<sup>35</sup>S]-Met (Amersham-Pharmacia) according to the manufacturer's protocol.

**DNA Capture.** DNA capture assay was performed as described previously (2). Biotinylated promoter fragments were amplified by PCR using 5' biotinylated oligonucleotides from wild-type or C/EBP $\alpha$  mutated plasmids. Equal molar quantities of biotinylated DNA templates were then immobilized on magnetic resins conjugated with streptavidin according to the manufacturer's instructions. Nuclear extracts (NE) from BOSC cells overexpressing C/EBP $\alpha$  and 32D overexpressing TAP or RP-TAP were mixed and incubated with immobilized DNA templates in binding buffer (20 mM Tris [pH 8.0], 10% glycerol, 6.25 mM MgCl<sub>2</sub>, 5 mM DTT, 0.1 mM EDTA, 0.01% Nonidet P-40) in a final concentration of 100 mM NaCl and in the presence of an excess of 0.2  $\mu$ g/ $\mu$ L of Poly (dI-dC). After mixing, the samples were incubated by rotation for an hour at 30 °C. The resin coated with immobilized templates was then washed twice with binding buffer. The proteins bound to the immobilized templates were eluted from the templates by boiling of the beads for 5 min in SDS/PAGE sample buffer. Proteins in SDS/PAGE sample buffer were resolved on polyacrylamide gels and transferred to PVDF membranes for Western blot analysis.

1. Smith LT, Hohaus S, Gonzalez DA, Dziennis SE, Tenen DG (1996) PU.1 (Spi-1) and C/EBP alpha regulate the granulocyte colony-stimulating factor receptor promoter in myeloid cells. *Blood* 88(4):1234–1247.

2. Grondin B, et al. (2007) c-Jun homodimers can function as a context-specific coactivator. *Mol Cell Biol* 27(8):2919–2933.

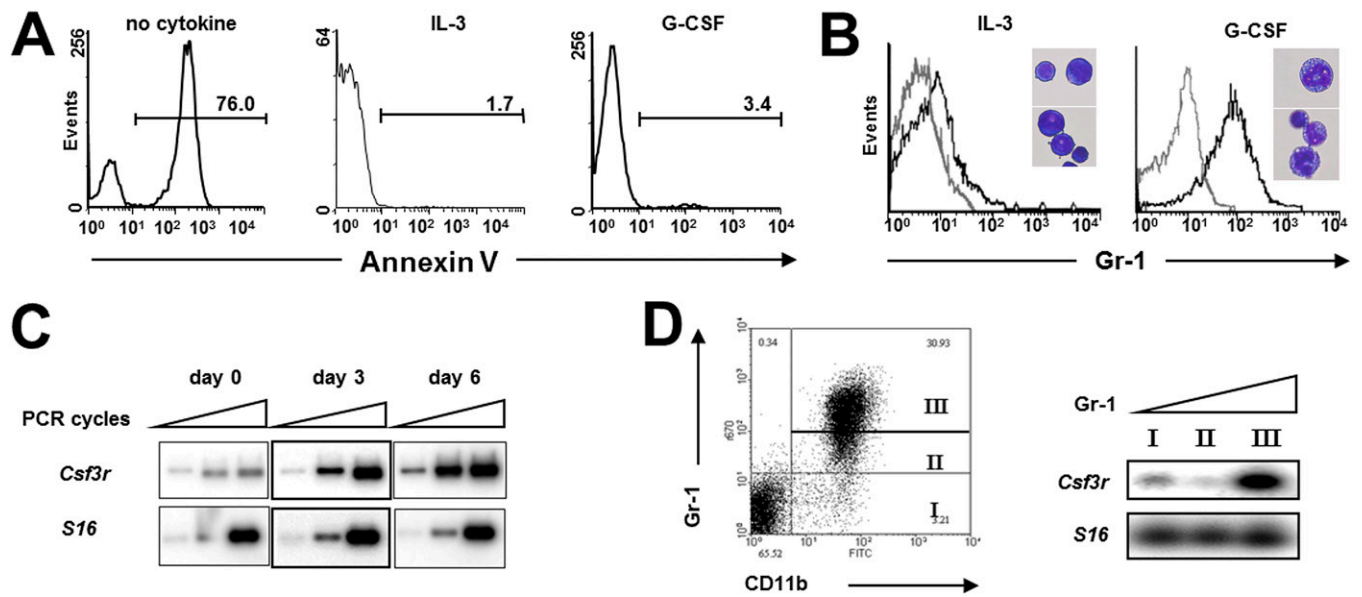

**Fig. 51.** G-CSF induces differentiation in myeloid 32D cells. (A) IL-3 or G-CSF suppresses apoptosis in 32D cells: The 32D immature myeloid cells were treated with IL-3 or G-CSF or deprived of cytokine for 24 h. Apoptosis was assessed by Annexin V labeling. (B) G-CSF treatment up-regulates Gr-1 expression. The 32D cells maintained in IL-3 or treated with G-CSF for 6 d. The 32D cells were labeled with Gr-1 and analyzed by flow cytometry. Black lines, Gr-1 staining; and gray lines, isotype-matched control antibody. *Insets*: cell morphology after 3 d of stimulation with IL-3 or G-CSF. (C) G-CSF treatment up-regulates *Csf3r* mRNA in 32D cells. Semiquantitative RT-PCR analysis of 32D cells undergoing granulocytic differentiation at the indicated times after G-CSF treatment. Amplification of ribosomal *S16* serves as a control for variations in input RNA. (D) Increased *Csf3r* expression in mature Gr1<sup>+</sup> granulocytes. CD11b<sup>+</sup> primary bone marrow cells were sorted into three fractions on the basis of Gr1 staining as indicated (*Left*). RT-PCR was performed as above on sorted cells (*Right*).



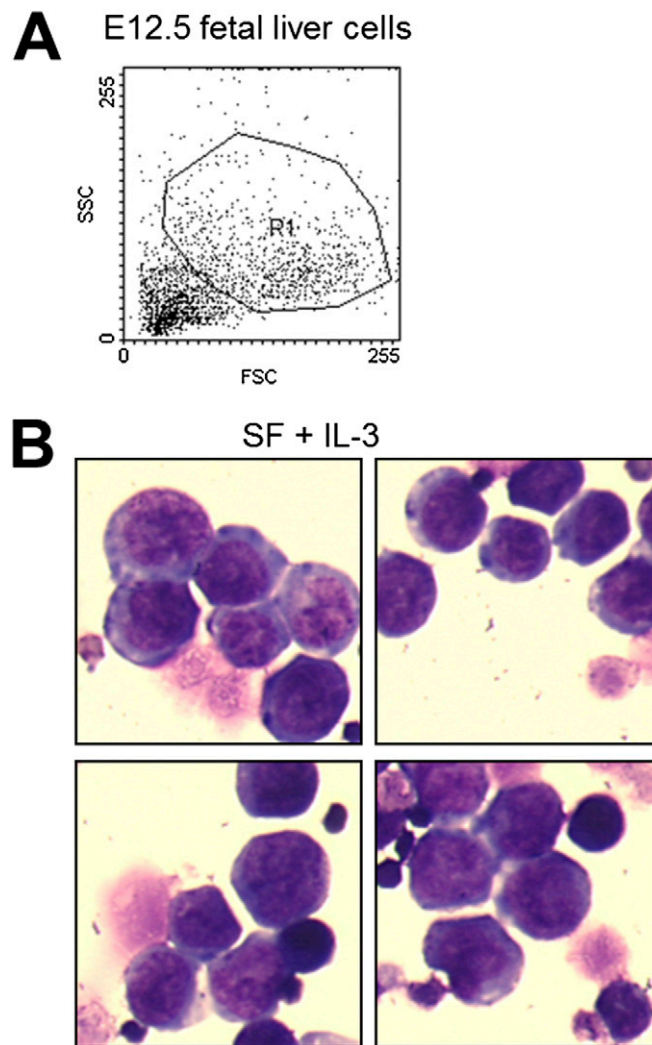

**Fig. S3.** Analysis of E12.5 fetal liver cells phenotype. (A) FACS analysis of E12.5 fetal liver cells. (B) Cytopsin of E12.5 fetal liver cells. E12.5 fetal liver cells exposed to SF and IL-3 for 48 h contain mostly undifferentiated myeloid cells.







**Table S1. List of primers for quantitative PCR analysis**

| Gene                                 | 5'→3' Forward primer sequence | Reverse 5'→3' primer sequence | Internal 5'→3' primer sequence |
|--------------------------------------|-------------------------------|-------------------------------|--------------------------------|
| <b>Semiquantitative RT-PCR</b>       |                               |                               |                                |
| <i>Csf3r</i>                         | ACATCTCCCTCCATGACTTT          | GATGTTTTTCATAAGATTTAGGG       | TCCATCTGACTTAAACATTTTC         |
| <i>Cebpa</i>                         | AAGAAGTCGGTGGACAAG            | AAACCATCCTCTGGGTCTC           | GAGTTGACCAGTGACAATGAC          |
| <i>S16</i>                           | AGGAGCGATTTGCTGGTGTGA         | GCTACCAGGGCCTTTGAGATG         | CCAAATTTATGATCCGACAGT          |
| <i>RARa-PLZF</i>                     | CTCTCCAGCACCAGCTTCCA          | GACGGCCATGTCACTGCCAG          | AAAGCCTTTGTCTGTGATCAG          |
| <i>PLZF-RARa</i>                     | AGCCTGAGGACTTGTCTGA           | GGGAAGCGGTTCTGGATAG           | AGAATGCACTTACTGGCTCATT         |
| <i>CSF3R</i>                         | AGGAGCCCCCTTACCCACT           | TGCTGTGAGCTGGGTCTGG           | AGTCTGTATCACATCCACCT           |
| <b>Quantitative PCR</b>              |                               |                               |                                |
| <i>Csf3r</i>                         | ACATCTCCCTCCATGACTTT          | GATGTTTTTCATAAGATTTAGGG       |                                |
| <i>Ltf</i>                           | ACAGACAAGGTGGAAGTCCTT         | TAGACTGGAACAGGCAAACTC         |                                |
| <i>Ela2</i>                          | ACAGTGGTGACTAACATGTG          | CAAGGTTGTTACAGACCAAG          |                                |
| <i>Mpo</i>                           | TCATTGGCACTCAGTTTAGGAA        | TGTTCAAGTAAACAGCAGAGACA       |                                |
| <i>Mir-223</i>                       | CAGTGTACGCTCCGTGTAT           | AGCCACACTTGGGGTATTTG          |                                |
| <i>HPRT</i>                          | GGCCAGACTTTGTTGGATTTG         | CACAGGACTAGAACACCTGC          |                                |
| <b>Chromatin immunoprecipitation</b> |                               |                               |                                |
| <i>Csf3r</i> promoter                | CTCTGGGAACAGGAGCTGAG          | GCAGGGAGTAAGCCTGTCTG          |                                |
| <i>Ela2</i> promoter                 | AGCCAGGGCTACACAGAAAC          | GAACCTCAGGGCCTTATGCAG         |                                |
| <i>Mpo</i> promoter                  | CCAGTGTCTGGGATTAGAAGC         | TGGGTTGTTTCCAGTTTCA           |                                |
| <i>Ltf</i> promoter                  | ACACCTGGTTGAGGGCAAT           | TTATCTGTCTGGGTGACCTC          |                                |
| <i>Mir-223</i> promoter              | GGTTGAGAATGGGTGGAGAC          | TGTGAGCAGGAAGGTCACAT          |                                |
| <i>Kit</i> promoter                  | TGTGGGGCTCCTGGTCTTA           | TAGCGGCGCGGACAG               |                                |
| <i>Hprt</i> promoter                 | CTACCTCTGTAGTGTGGGAT          | CAGCATTAGGAGGCAGAGG           |                                |
| <b>DNA capture assay</b>             |                               |                               |                                |
| <i>Csf3r</i> promoter                | GCAGCAGGAAGCCAG               | GCTTGTGCTCTCTTCTCTCTC         |                                |
